# Supplementary material
Source: Springer Nature journal article supplement (https://www.springermedizin.de/resource/supplementary/13053_2009_143_MOESM3_ESM.pdf/9674286)
Supplement: MOESM3 [file 9674286]

Up-going arrow shows increase in risk perception after genetic counseling. Every arrow represents one participant.

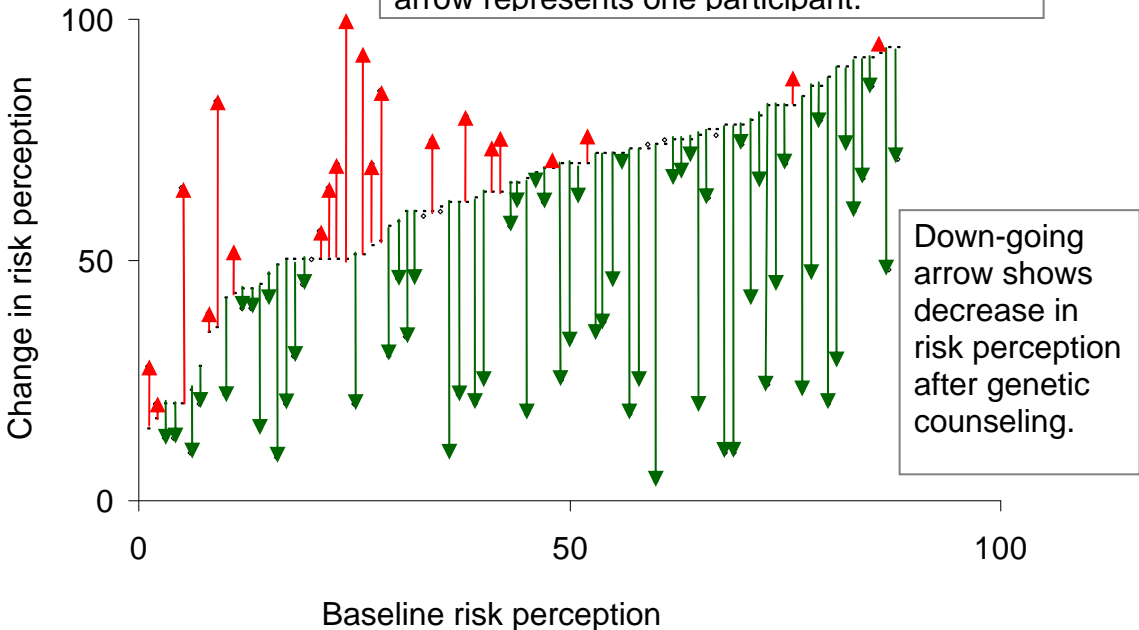

Down-going arrow shows decrease in risk perception after genetic counseling.
